# Supplementary material for: Cellular localization and regulation of receptors and enzymes of the endocannabinoid system in intestinal and systemic inflammation
Source: PubMed Central journal article supplement (PMC6328631; doi:10.1007/s00418-018-1719-0), 2018-09-08

Online resources, supplementary material to the article:

**Cellular localization and regulation of receptors and enzymes of the endocannabinoid system in intestinal and systemic inflammation**

Journal: Histochemistry and Cell Biology

Authors: <sup>1</sup> Magdalena Grill, <sup>1</sup> Carina Hasenoehrl, <sup>1,2</sup> Melanie Kienzl, <sup>1</sup> Julia Kargl, <sup>1,2,\*</sup> Rudolf Schicho

Affiliation: <sup>1</sup> Otto Loewi Research Center, Pharmacology Section, Medical University of Graz, Graz, Austria; <sup>2</sup> BioTechMed Graz, Austria

\*Corresponding author: Rudolf Schicho ([rudolf.schicho@medunigraz.at](mailto:rudolf.schicho@medunigraz.at))

Online resource **Fig. 1:**

Representative immunohistochemical staining of GPR55 using polyclonal rabbit anti-GPR55 antibody (1:500, Cayman Chemicals, Ann Arbor, MI, USA) in murine wildtype (**a**) and GPR55<sup>-/-</sup> (**b**) colon tissue; note unspecific staining in the GPR55<sup>-/-</sup> tissue. (**c**) Testing of several anti-GPR55 antibodies in colon tissue of wildtype (WT1-WT7) and GPR55<sup>-/-</sup> (knockout, KO1-KO7) mice by SDS-Page/ Western blot analysis (used antibodies: Thermo Sc: rabbit anti-GPR55 antibody, ThermoFisher Scientific, Waltham, MA, USA; Abcam: polyclonal rabbit anti-GPR55 antibody, Abcam, Cambridge, UK; Cayman: polyclonal rabbit anti-GPR55 Ab, Cayman Chemicals; Genetex 1 and 2: polyclonal rabbit anti-GPR55 antibody, GeneTex International Corporation, Irvine, CA, USA). (**d**) Comparison of *CB<sub>1</sub>*, *CB<sub>2</sub>*, *GPR55* and *MGL* gene expression in murine colon and ileum by qRT-PCR.

Online resource **Fig. 2:**

ISH RNAscope® staining of *CB<sub>1</sub>* (**a, b**), *CB<sub>2</sub>* (**c, d**), *MGL* (**e, f**) and *GPR55* (**g, h**) in wildtype (**a, c, e, g**) and corresponding knockout mice (**b, d, f, h**). Inserts show higher magnification of relevant region with high expression of the target gene in wildtype tissue. Calibration bar low magnification: 20 μm, Insert: 10 μm.

# Online resource Fig. 1

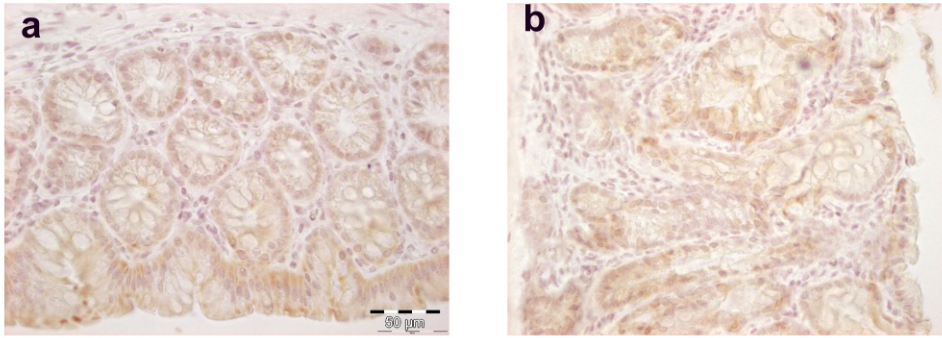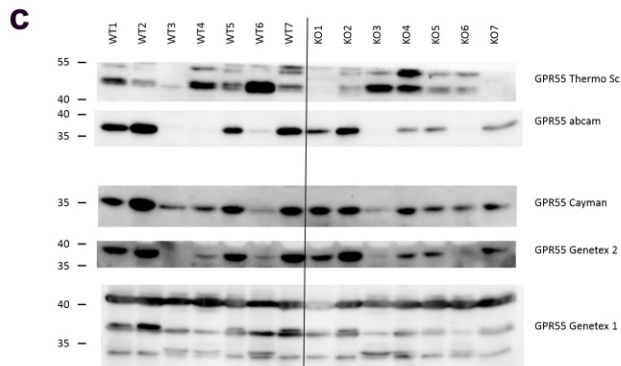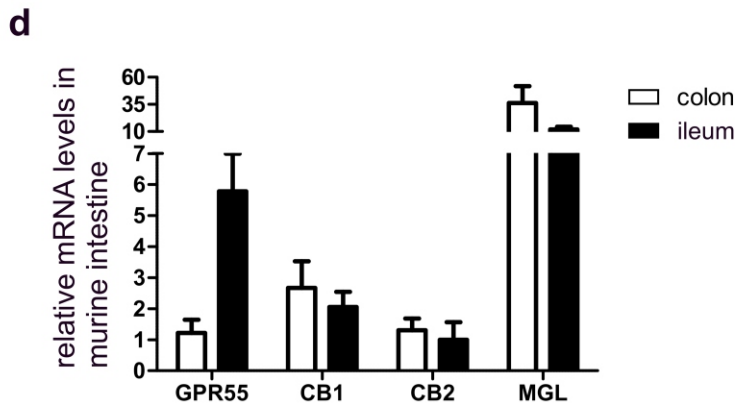

# Online resource Fig. 2

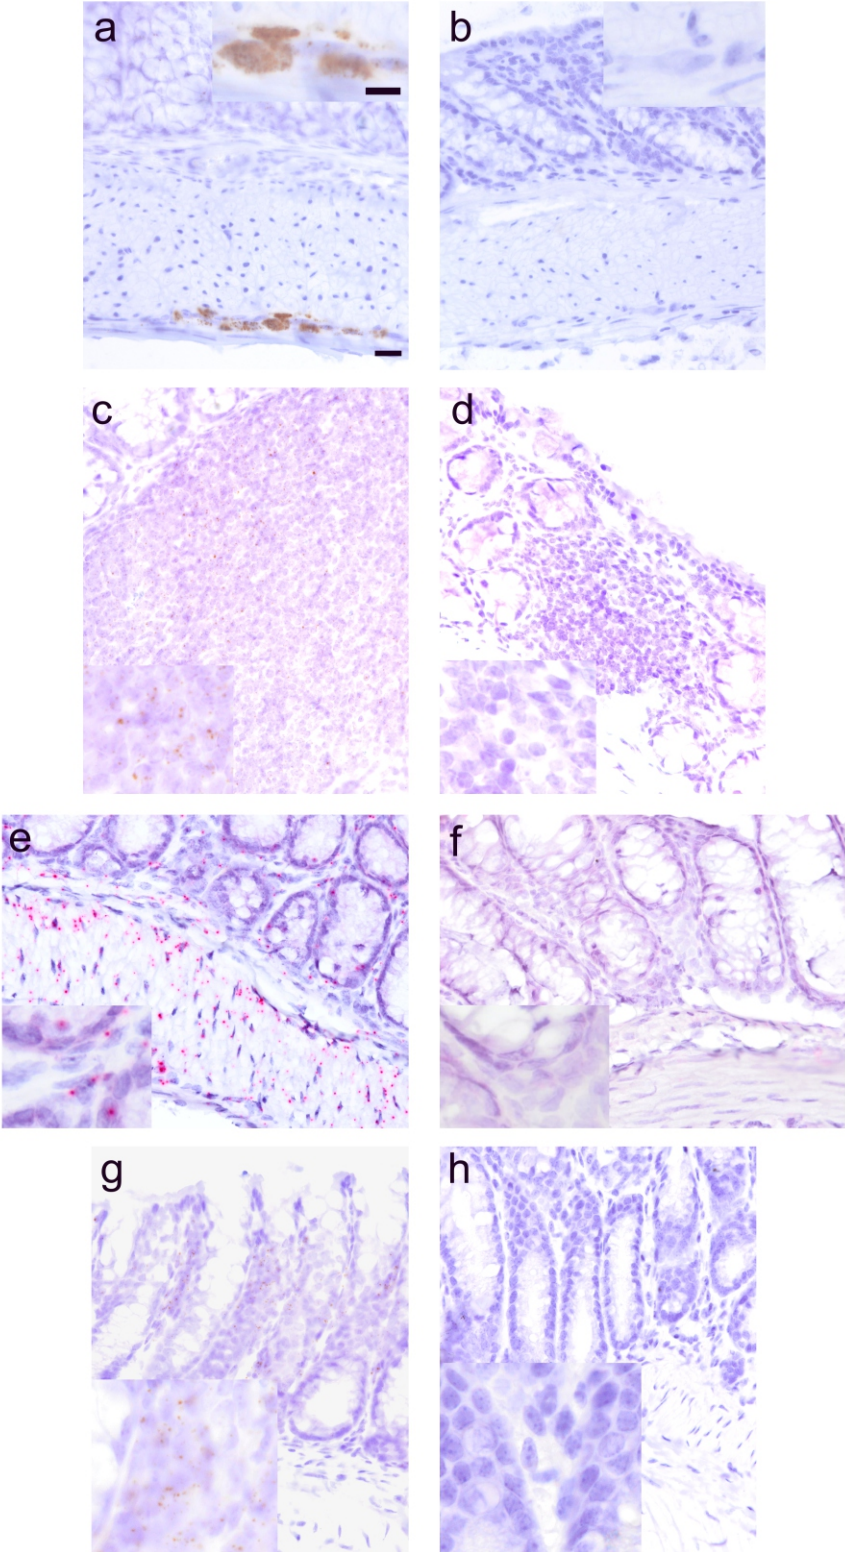

Supplement: 418_2018_1719_MOESM1_ESM.pdf [file 418_2018_1719_MOESM1_ESM.pdf]
